# Supplementary material
Source: Springer Nature journal article supplement (https://springermedizin.de/resource/supplementary/13075_2012_3844_MOESM2_ESM.pdf/9695464)

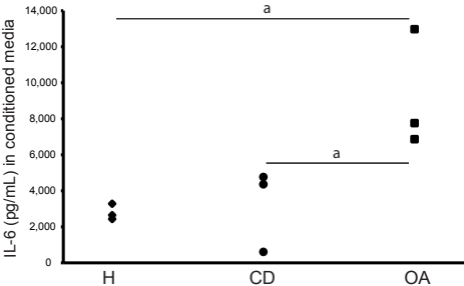

Supplement: MOESM2 [file 9695464]
